# Supplementary material for: Ag-Boosted CoO x /BiVO 4 p–n heterojunction for efficient photoelectrochemical water splitting
Source: Royal Society of Chemistry journal article supplement (doi:10.1039/d5nj03912f), 2025-01-01
Supplement: d5nj03912f1.pdf [file d5nj03912f1.pdf]

## Supporting Information

### **Ag-Boosted CoO<sub>x</sub>/BiVO<sub>4</sub> p-n Heterojunction for Efficient Photoelectrochemical Water Splitting**

Zhouchen Li <sup>a,1</sup>, Linyao Deng <sup>a,1</sup>, Tingting Liu<sup>a</sup>, Yihui Chen<sup>a</sup>, Yutong Guo <sup>a</sup>, Jingwei Huang <sup>a\*</sup>

<sup>a</sup> College of Chemistry and Chemical Engineering, Gansu International Scientific and Technological Cooperation Base of Water-Retention Chemical Functional Materials, Northwest Normal University, Lanzhou 730070, China

\*Corresponding author. E-mail: [huangjingwei2009@163.com](mailto:huangjingwei2009@163.com), [huangjingwei@nwnu.edu.cn](mailto:huangjingwei@nwnu.edu.cn)

<sup>1</sup> These authors contributed equally to this work

## Supplementary Figures

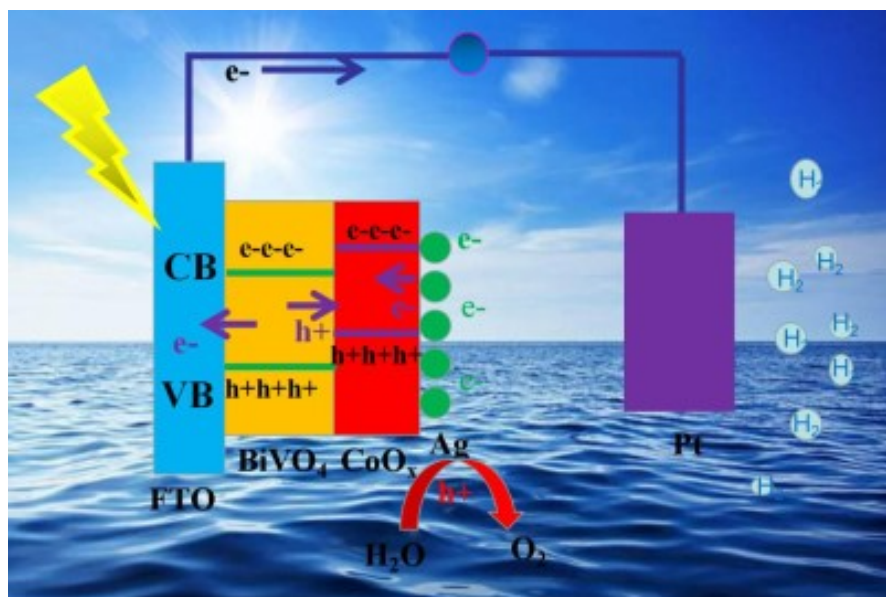

**Fig. S1.** Schematic illustration for the charge transfer and separation as well as PEC water splitting process of BiVO<sub>4</sub>/CoO<sub>x</sub>/Ag architecture under visible light illumination.

As shown in Fig. S1, under simulated solar illumination from the backside, the BiVO<sub>4</sub>/CoO<sub>x</sub>/Ag photoanode undergoes charge generation via photon absorption. Within the n-type BiVO<sub>4</sub> semiconductor, electrons are excited to the conduction band (CB) while holes remain in the valence band (VB). Concurrently, the p-type CoO<sub>x</sub> layer generates electron-hole pairs upon illumination. A type-II p-n heterojunction forms due to band alignment mismatch between BiVO<sub>4</sub> and CoO<sub>x</sub>, establishing a built-in electric field at their interface. This field drives electrons from the CoO<sub>x</sub> CB to the BiVO<sub>4</sub> CB, followed by migration through the external circuit to the Pt counter electrode for water reduction. Simultaneously, holes transfer from the BiVO<sub>4</sub> VB to the CoO<sub>x</sub> VB, facilitating water oxidation at the electrode-electrolyte interface. Plasmonic excitation of Ag nanoparticles under illumination generates hot electrons that inject into the CoO<sub>x</sub> CB. This process synergistically accelerates electron transport and suppresses charge recombination.

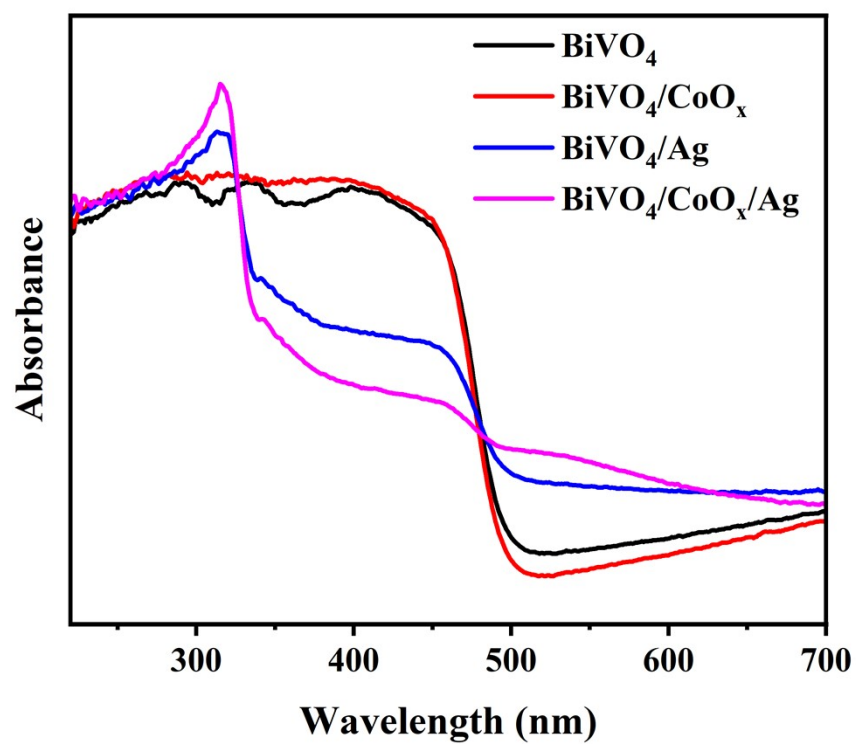

**Fig. S2.** UV-vis DRS of  $\text{BiVO}_4$ ,  $\text{BiVO}_4/\text{CoO}_x$ ,  $\text{BiVO}_4/\text{Ag}$  and  $\text{BiVO}_4/\text{CoO}_x/\text{Ag}$ .

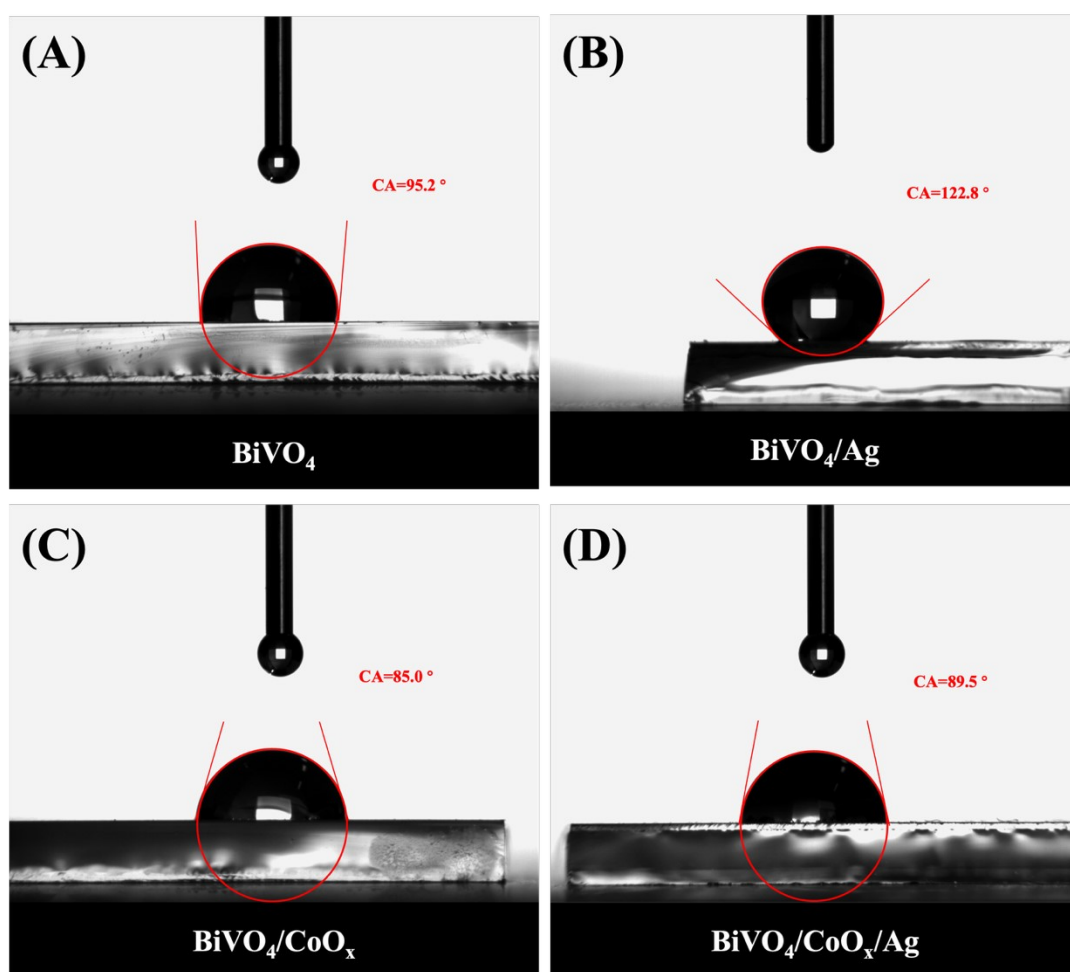

**Fig. S3.** Static water contact angle tests of (A)  $BiVO_4$ , (B)  $BiVO_4/Ag$ , (C)  $BiVO_4/CoO_x$ , (D)  $BiVO_4/CoO_x/Ag$ .

As shown in Fig. S3, static water contact angle (CA) measurements reveal distinct interfacial properties:  $BiVO_4/Ag$  exhibits strong hydrophobicity ( $CA = 122.8^\circ$ ), attributed to the low surface energy of metallic Ag. In contrast, hydroxyl-rich  $CoO_x$  enhances hydrophilicity when deposited on  $BiVO_4$  ( $CA = 85.0^\circ$ ). The ternary  $BiVO_4/CoO_x/Ag$  system demonstrates moderated hydrophilicity ( $CA = 89.5^\circ$ ) compared to pristine  $BiVO_4$  ( $CA = 95.2^\circ$ ), suggesting synergistic interfacial modification. This optimized surface wettability facilitates electrolyte diffusion across the electrode-electrolyte interface, thereby enhancing photocurrent density during water oxidation.

Table S1 Quantitative values obtained from the equivalent circuit for all electrodes.

| Electrodes                                          | $R_s(\Omega)$ | $R_{ct}(\Omega)$ |
|-----------------------------------------------------|---------------|------------------|
| $\text{BiVO}_4$                                     | 20.3          | 966.0            |
| $\text{BiVO}_4(\text{dark})$                        | 21.6          | 1261.0           |
| $\text{BiVO}_4/\text{Ag}$                           | 23.2          | 746.0            |
| $\text{BiVO}_4/\text{Ag}(\text{dark})$              | 25.7          | 1069.0           |
| $\text{BiVO}_4/\text{CoO}_x$                        | 20.7          | 705.5            |
| $\text{BiVO}_4/\text{CoO}_x(\text{dark})$           | 22.5          | 1292.0           |
| $\text{BiVO}_4/\text{CoO}_x/\text{Ag}$              | 22.3          | 190.4            |
| $\text{BiVO}_4/\text{CoO}_x/\text{Ag}(\text{dark})$ | 23.5          | 1306.0           |
